# Supplementary material
Source: publisher figshare collection journal article supplement (https://acs.figshare.com/ndownloader/files/4716346)
Supplement: Supplementary file 1 [file 4716346]

**Supporting information**


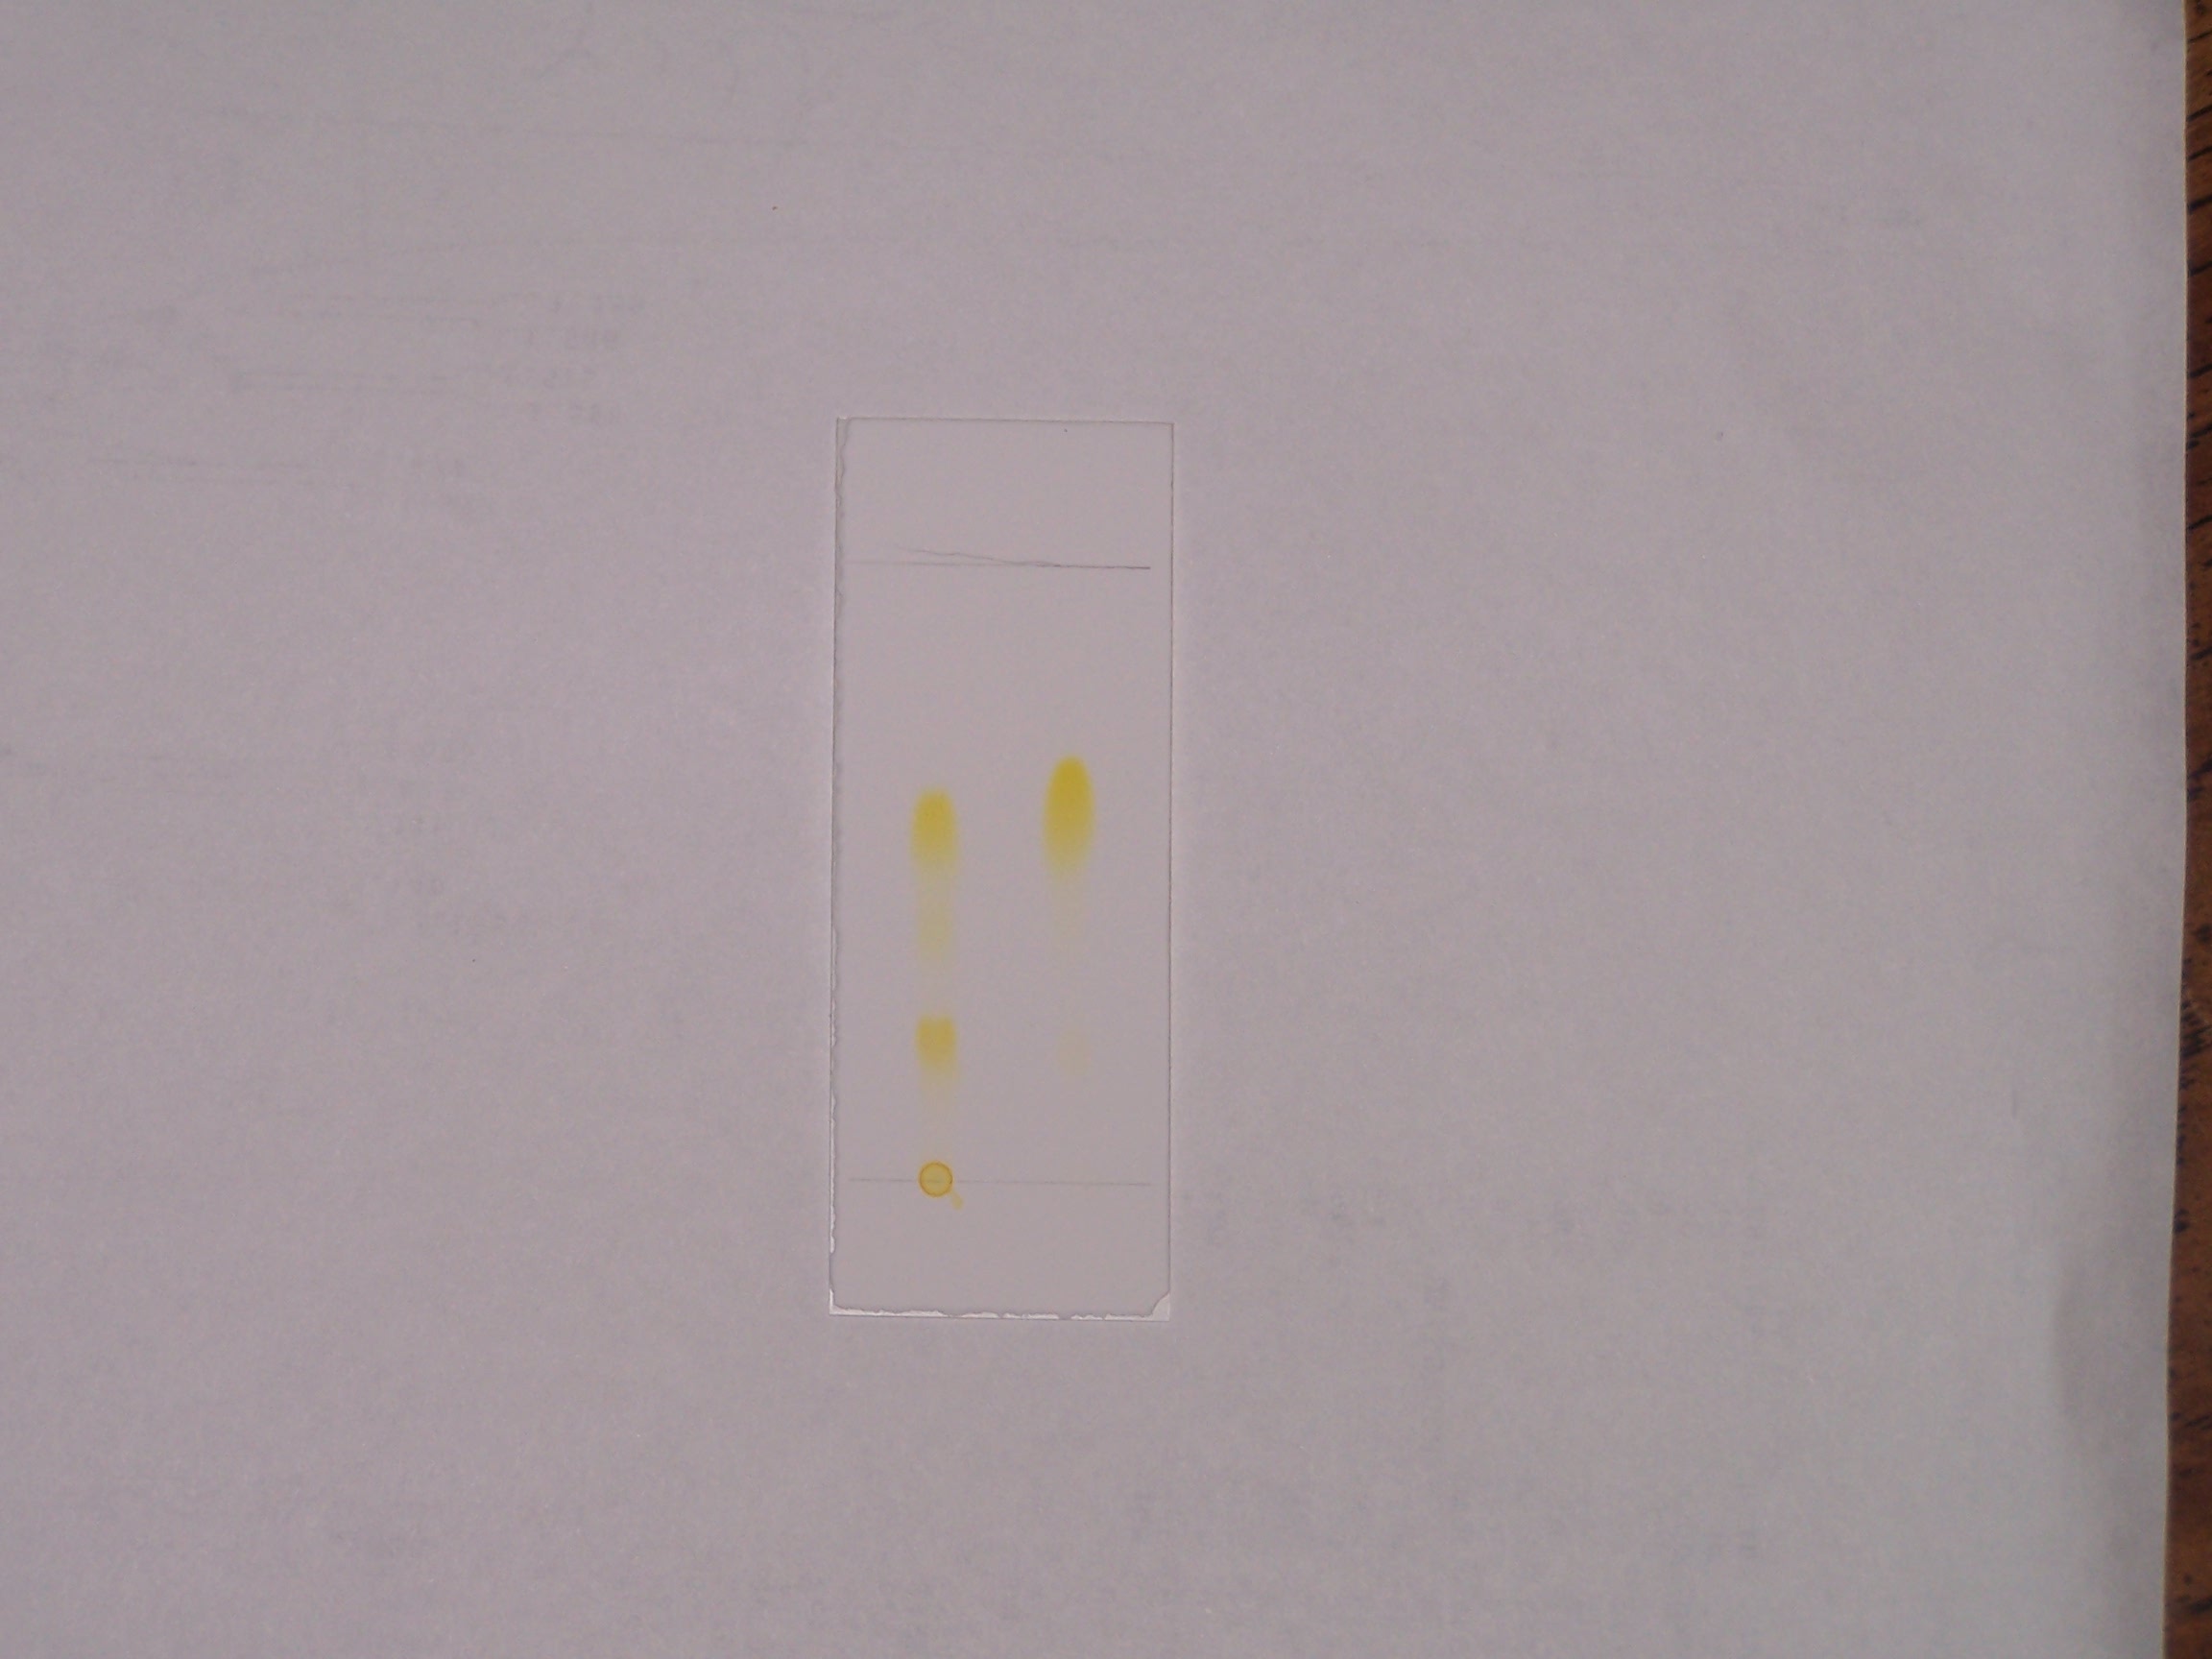


**Figure S1.** Thin-Layer-Chromatography (TLC) analysis (developed in heptane) Left: the sample obtained at room temperature, Right: the refluxed sample. It was noticeable that, 1) for the sample obtained at room temperature, some product (the lowest yellow point) was left on the starting line, which did not occur for the heated sample. It implies that in the room temperature sample, there are some species so strongly adsorbed on the TLC substrate that can not be developed. 2) the highest point of the room temperature sample was roughly at the same level as the point of the refluxed sample, indicating that the Pd6 tiara product was formed in both cases.

**Figure S2.** 1H NMR (80 ºC in deutero-benzene, sealed MNR tube) spectrum of [Pd(SC12H25)2]6. (3.00 ppm, 12H (t); 2.80 ppm, 12H (t); 2.12 ppm, 12H (q); 2.02 ppm, 12H (q); 1.70-1.36 ppm, 216H(m); 0.94 ppm, 36H (m).)


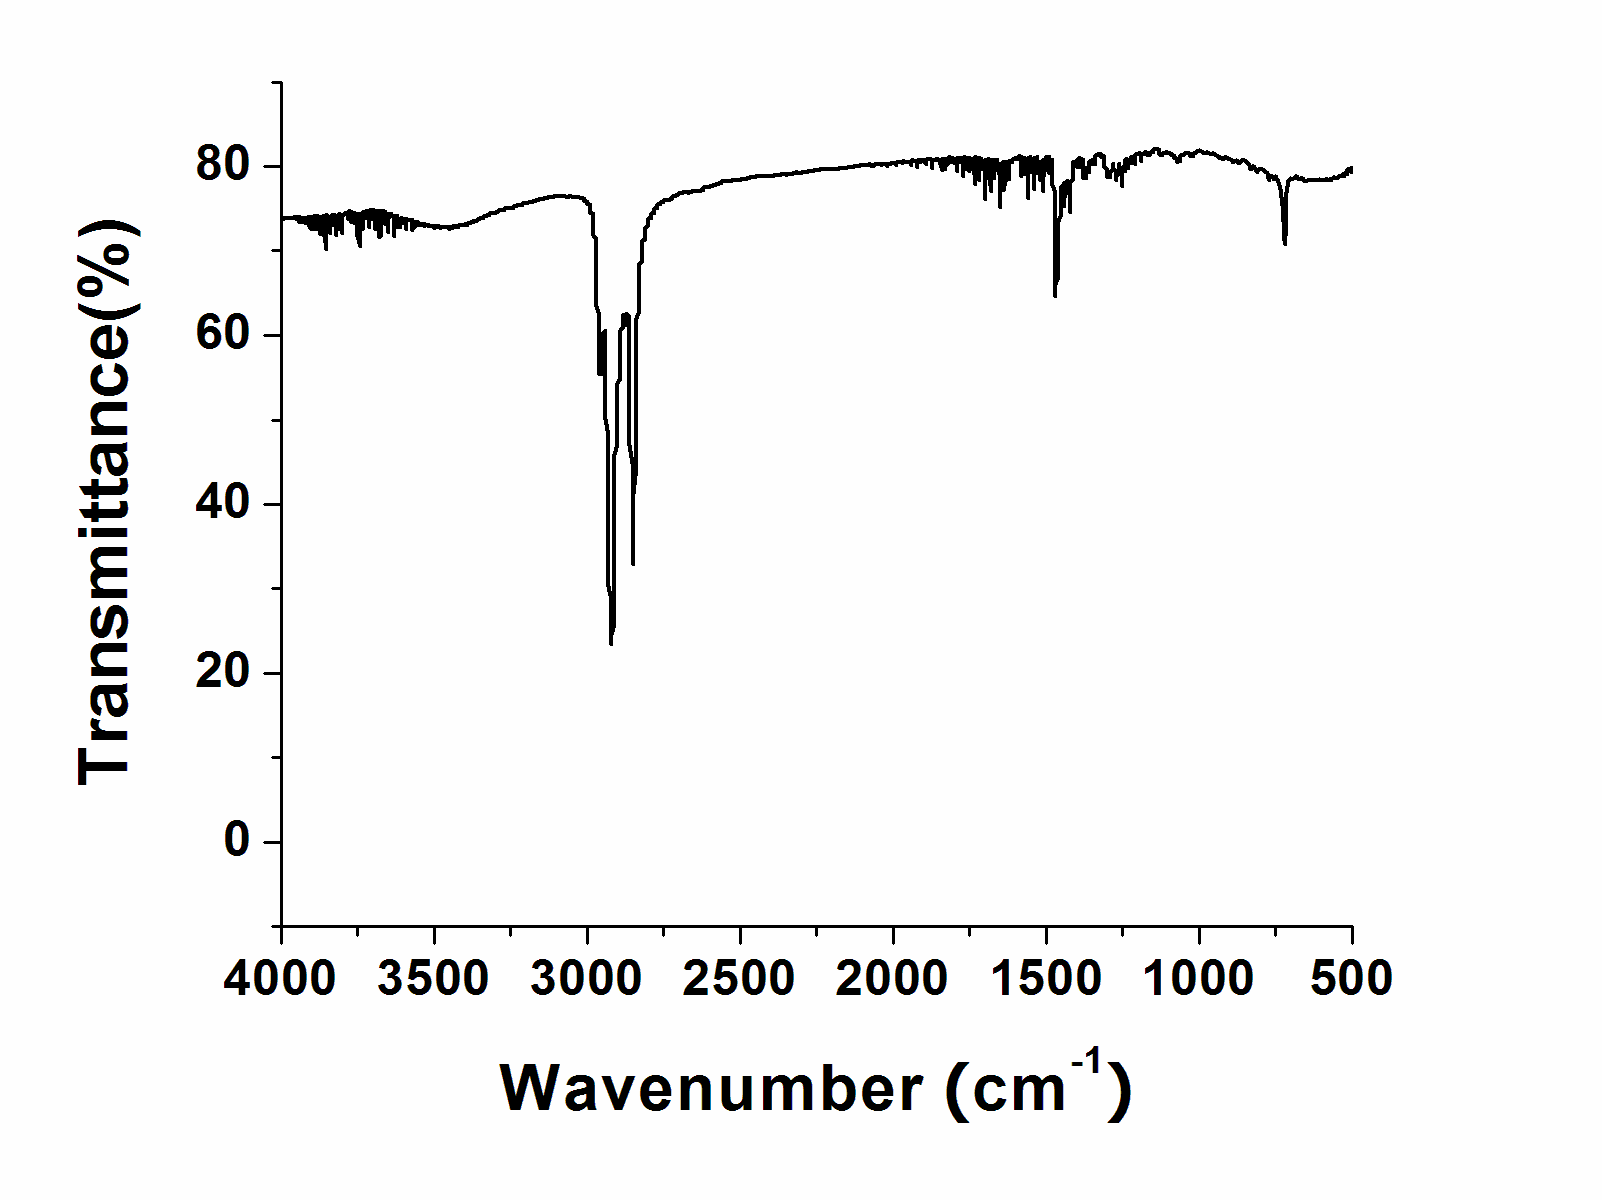


**Figure S3.** IR spectrum of [Pd(SC12H25)2]6. (in KBr pellet)


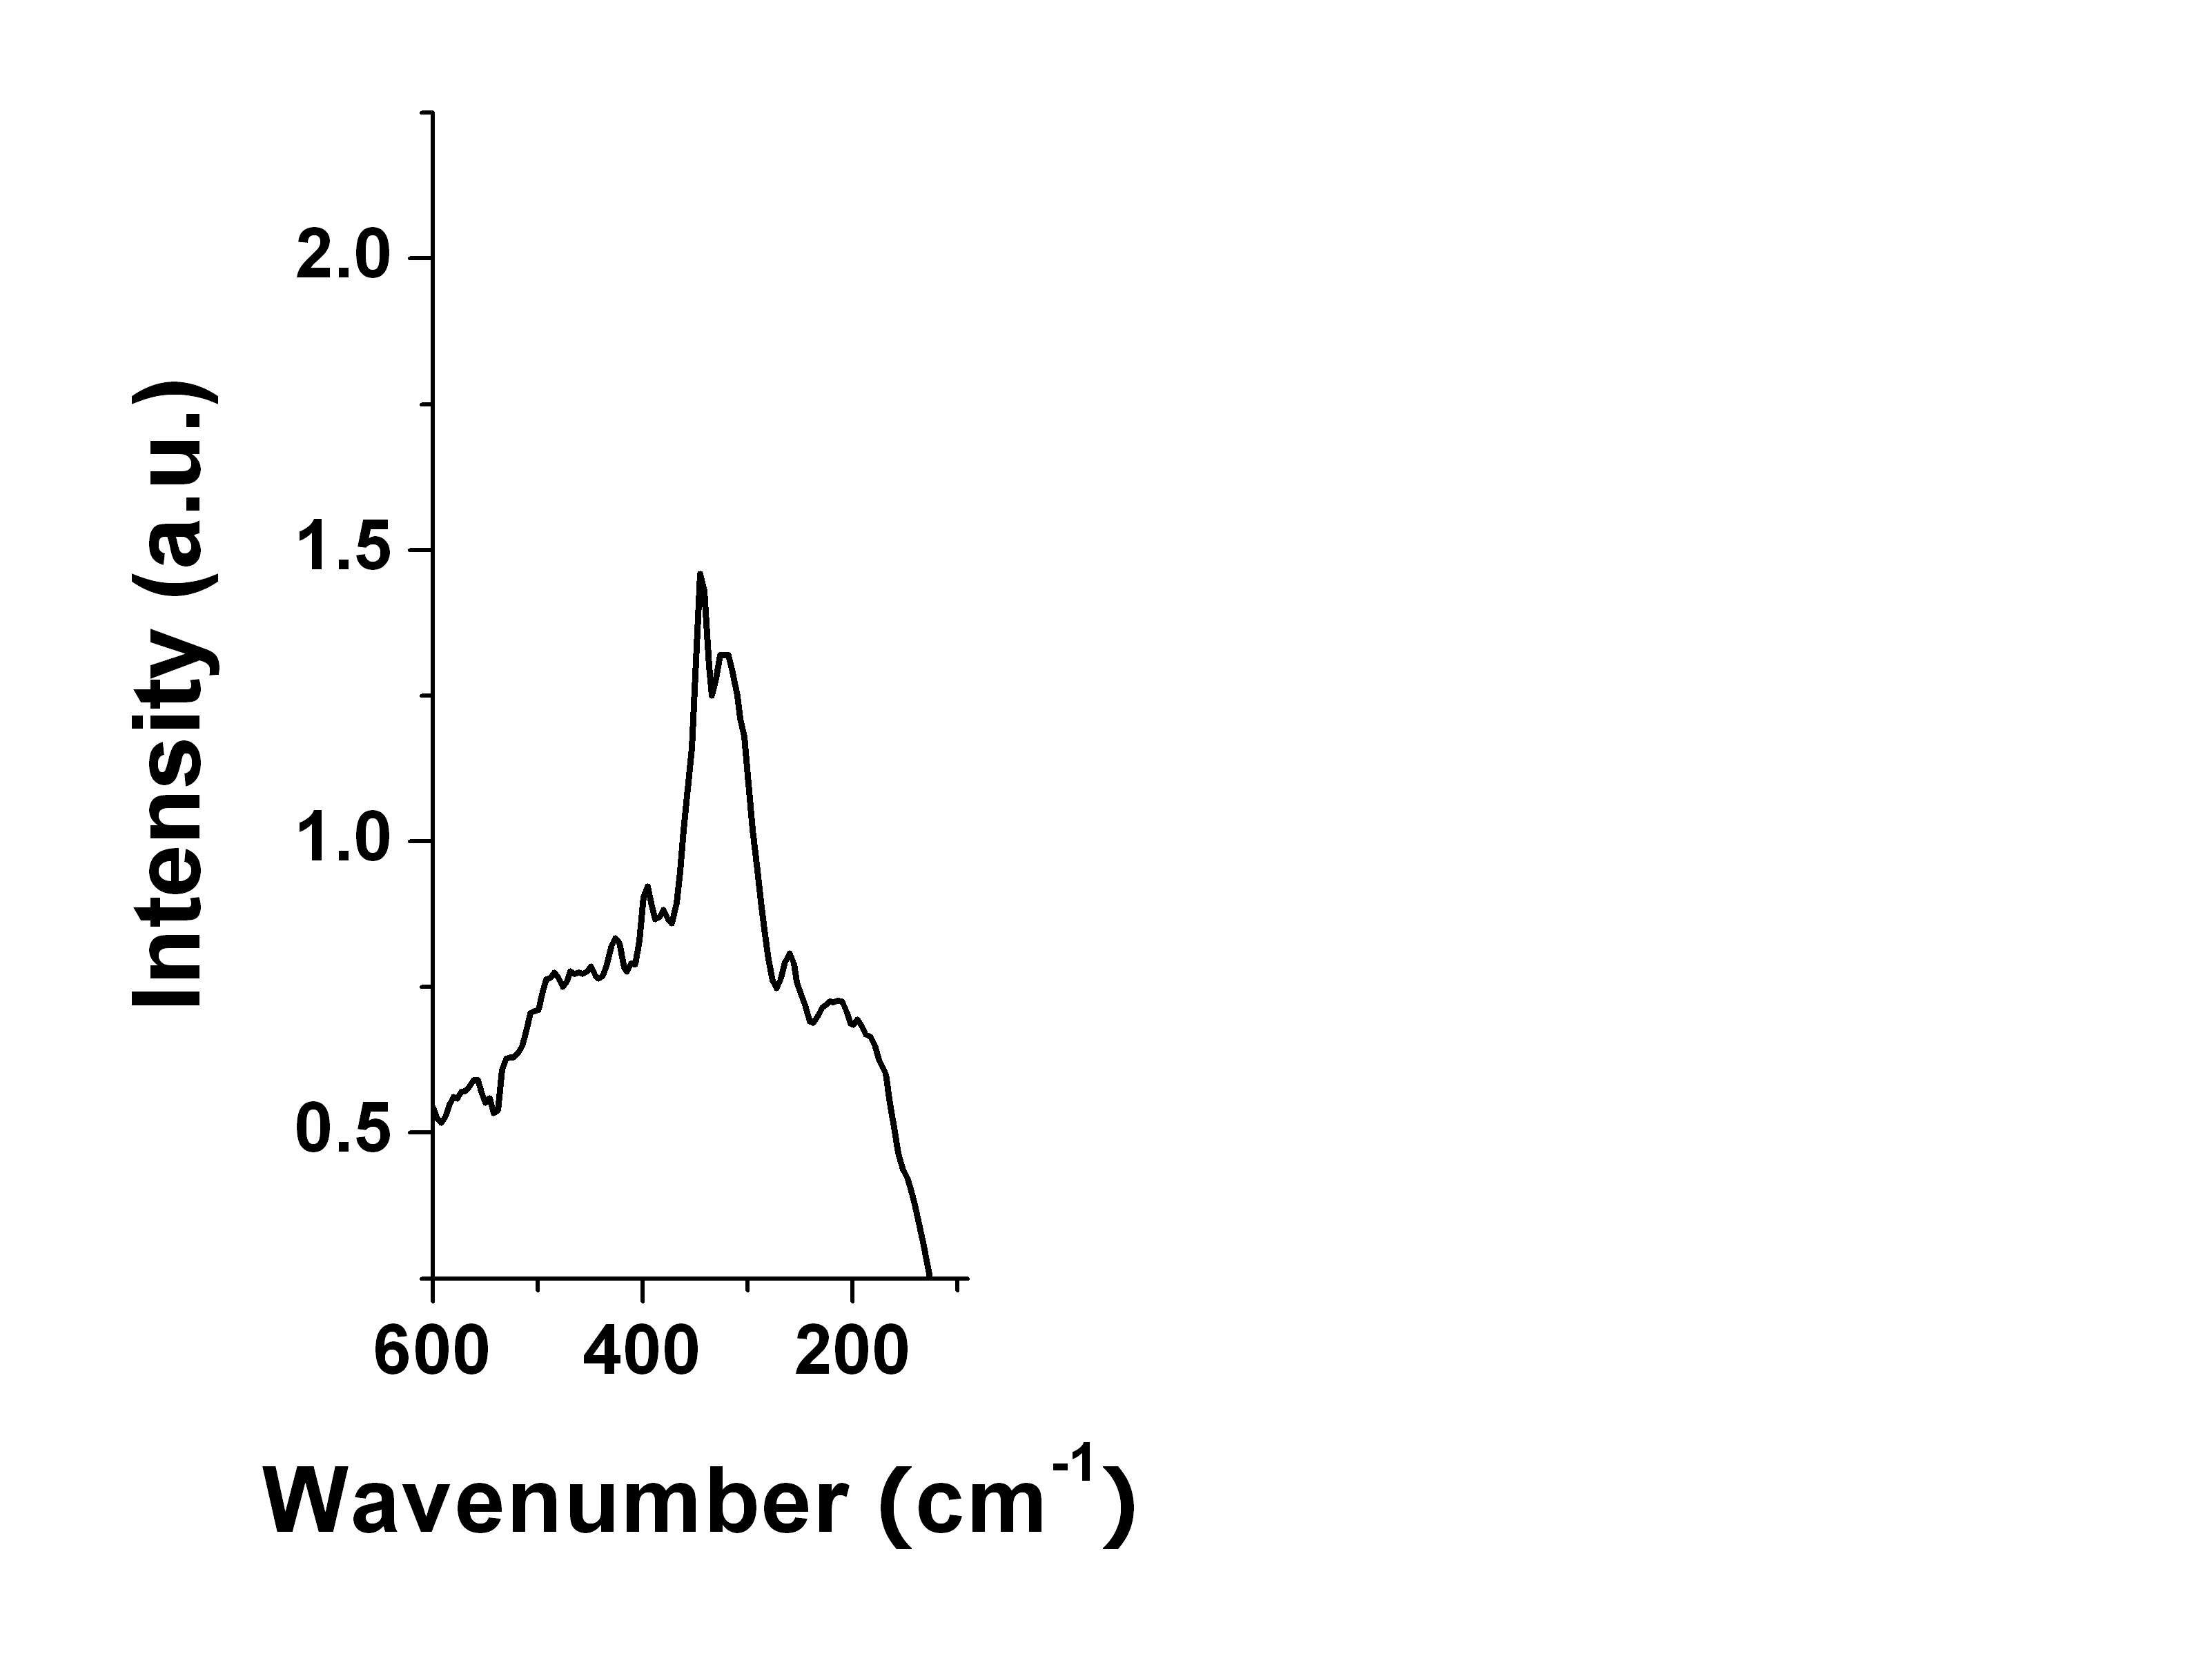


**Figure S4.** Raman spectrum of [Pd(SC12H25)2]6.


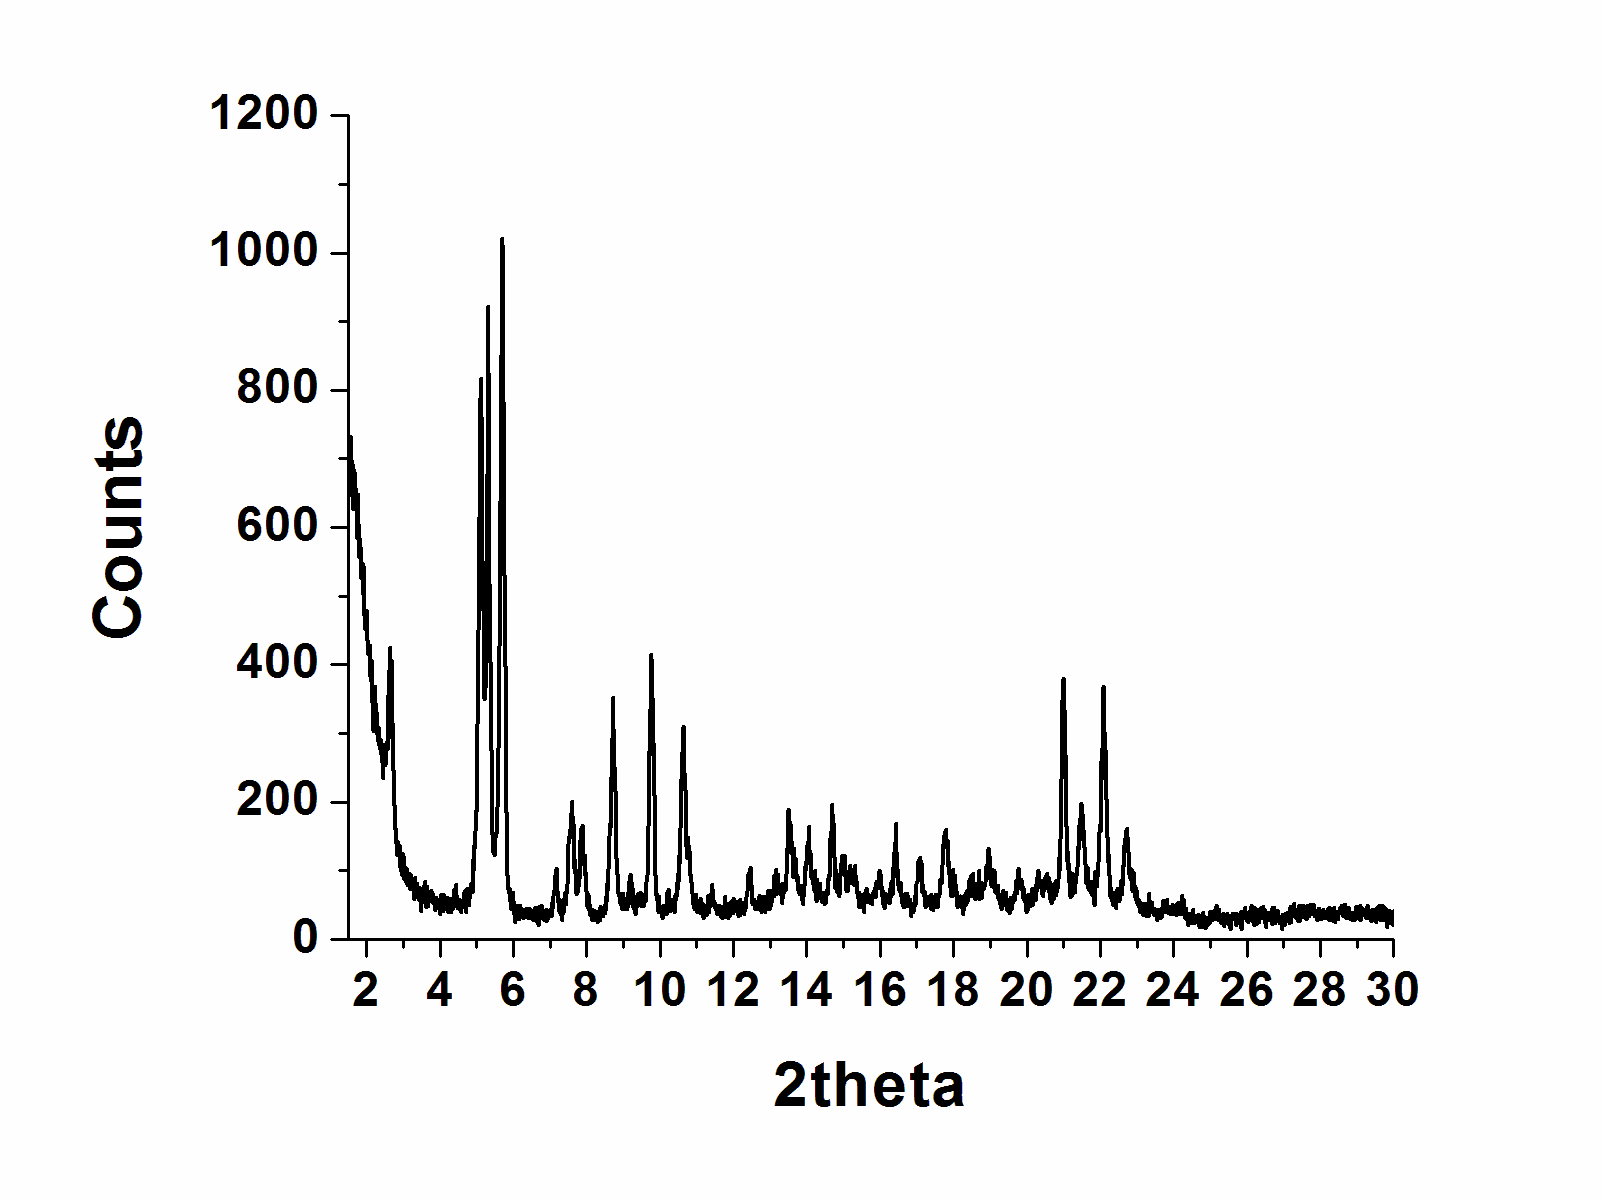


**Figure S5.** Powder XRD pattern of [Pd(SC12H25)2]6.


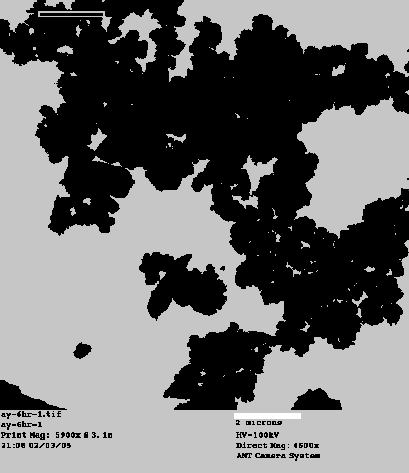


**Figure S6.** Some aggregated particles obtained after refluxing [Pd(SC12H25)2]6 for 8 hr. (scale bar = 2 μm)


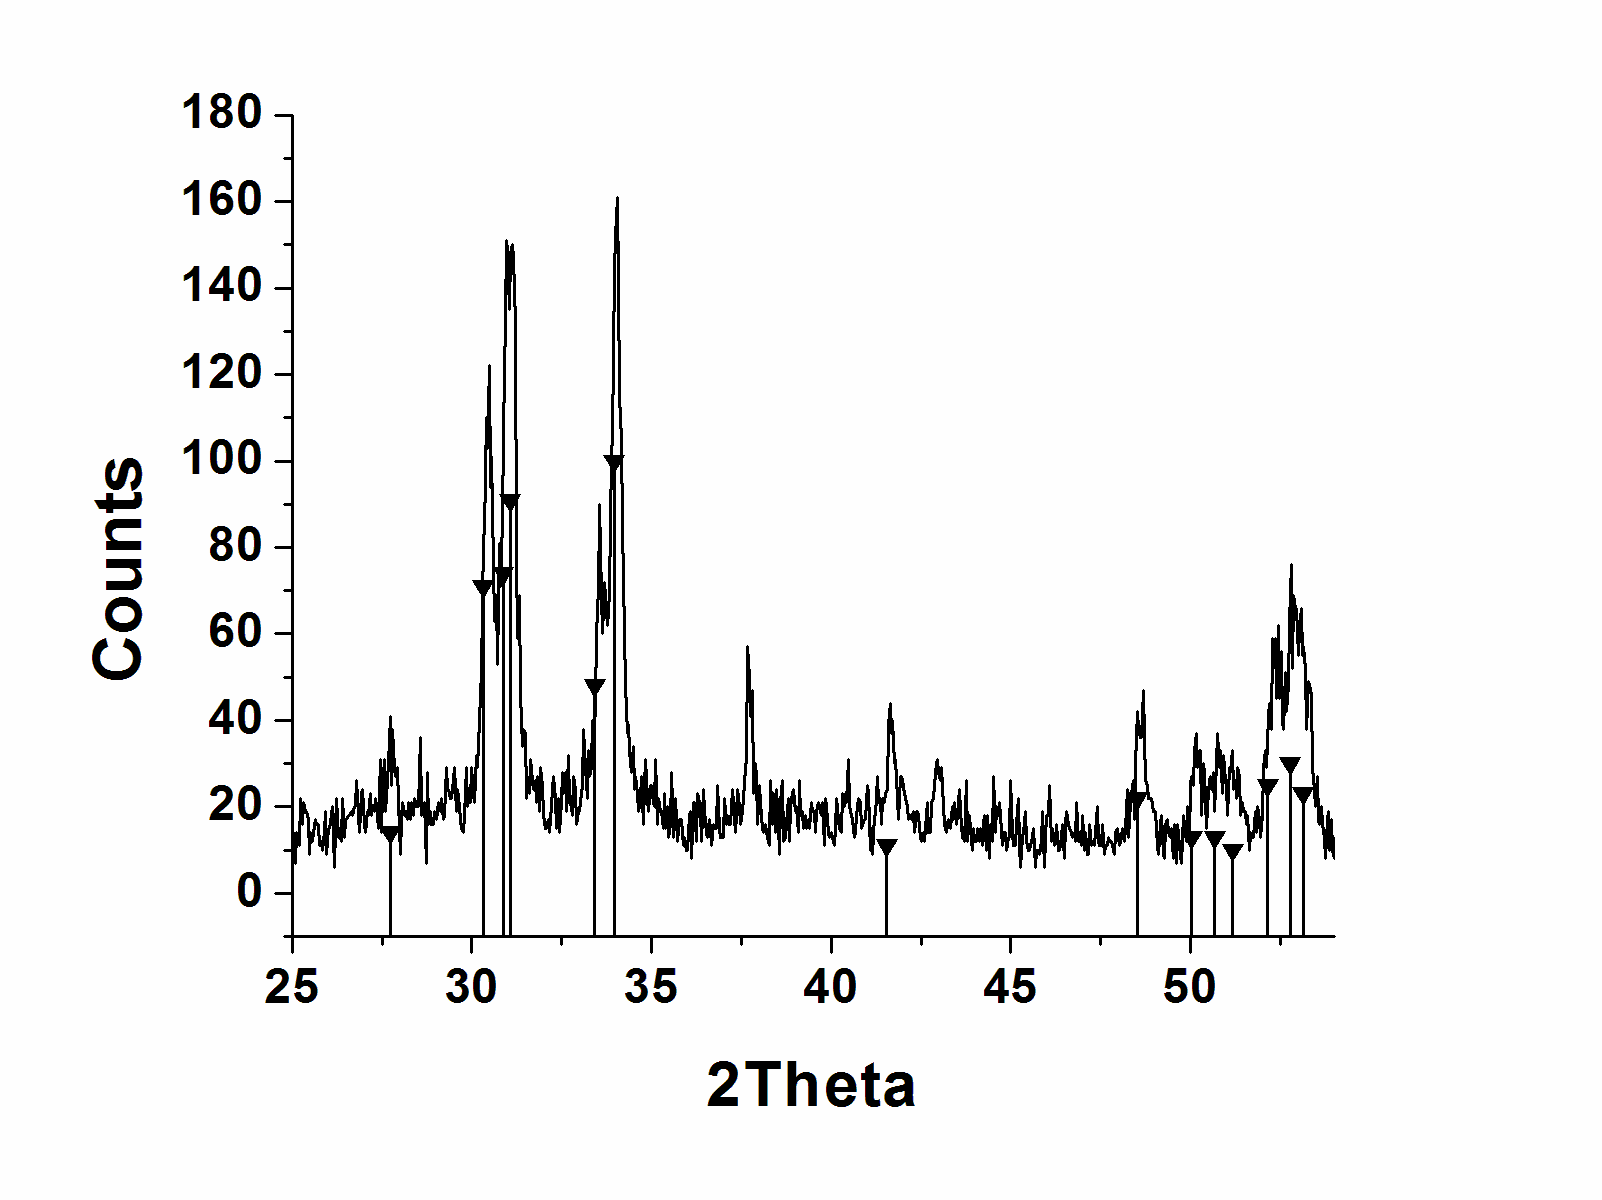


**Figure S7.** Powder XRD pattern of the products obtained by refluxing [Pd(SC12H25)2]6 for 8 hr. (The standard PdS pattern is from JCPDS file 25-1234)

**Table S1**. Crystal data and structure refinement of [Pd(SC12H25)2]6.

| Empirical formula | C24 H50 Pd S2 | |
| --- | --- | --- |
| Formula weight | 509.16 | |
| Temperature | 173(2) K | |
| Wavelength | 0.71073 Å | |
| Crystal system | Triclinic | |
| Space group | P-1 | |
| Unit cell dimensions | a = 13.2189(14) Å | = 66.529(5)°. |
| b = 18.2919(18) Å | = 70.892(8)°. |
| c = 19.1575(19) Å |  = 77.054(7)°. |
| Volume | 3991.4(7) Å3 | |
| Z | 6 | |
| Density (calculated) | 1.271 g/cm3 | |
| Absorption coefficient | 0.862 mm-1 | |
| F(000) | 1632 | |
| Crystal size | 0.40 x 0.20 x 0.10 mm3 | |
| Theta range for data collection | 1.64 to 27.51°. | |
| Index ranges | -16<=h<=17, -23<=k<=21, -24<=l<=24 | |
| Reflections collected | 28432 | |
| Independent reflections | 17309 [R(int) = 0.1073] | |
| Completeness to theta = 27.51° | 94.4 % | |
| Absorption correction | None | |
| Refinement method | Full-matrix least-squares on F2 | |
| Data / restraints / parameters | 17309 / 0 / 736 | |
| Goodness-of-fit on F2 | 0.859 | |
| Final R indices [I>2sigma(I)] | R1 = 0.0618, wR2 = 0.1342 | |
| R indices (all data) | R1 = 0.1456, wR2 = 0.1616 | |
| Largest diff. peak and hole | 1.336 and -1.150 e.Å-3 | |

**Table S2.** Main bond lengths [Å] of [Pd(SC12H25)2]6.

| Pd(1)-S(1) | 2.3119(19) | Pd(3)-S(6) | 2.3117(17) |
| --- | --- | --- | --- |
| Pd(1)-S(6)#1 | 2.3141(19) | Pd(3)-S(4) | 2.3151(19) |
| Pd(1)-S(2) | 2.3195(19) | Pd(3)-S(5) | 2.3257(19) |
| Pd(1)-S(5)#1 | 2.3220(19) | Pd(3)-S(3) | 2.3279(17) |
| Pd(1)-Pd(2) | 3.0430(8) | Pd(3)-Pd(1)#1 | 3.1355(8) |
| Pd(1)-Pd(3)#1 | 3.1356(8) | S(1)-C(01) | 1.816(7) |
| Pd(2)-S(3) | 2.3113(19) | S(2)-C(13) | 1.816(6) |
| Pd(2)-S(2) | 2.3127(19) | S(3)- C(25) | 1.815(7) |
| Pd(2)-S(1) | 2.3170(17) | S(4)- C(37) | 1.828(7) |
| Pd(2)-S(4) | 2.3211(17) | S(5)-C(49) | 1.818(7) |
| Pd(2)-Pd(3) | 3.1643(8) | S(6)-C(61) | 1.810(7) |

**Table S3.** Main bond angles [°] for [Pd(SC12H25)2]6.

| S(1)-Pd(1)-S(6)#1 | 98.67(7) | S(4)-Pd(3)-S(5) | 177.10(7) |
| --- | --- | --- | --- |
| S(1)-Pd(1)-S(2) | 81.00(7) | S(6)-Pd(3)-S(3) | 168.32(7) |
| S(6)#1-Pd(1)-S(2) | 170.16(6) | S(4)-Pd(3)-S(3) | 82.90(6) |
| S(1)-Pd(1)-S(5)#1 | 178.33(7) | S(5)-Pd(3)-S(3) | 97.11(7) |
| S(6)#1-Pd(1)-S(5)#1 | 82.95(7) | S(6)-Pd(3)-Pd(1)#1 | 47.36(5) |
| S(2)-Pd(1)-S(5)#1 | 97.33(7) | S(4)-Pd(3)-Pd(1)#1 | 130.31(5) |
| S(1)-Pd(1)-Pd(2) | 48.97(4) | S(5)-Pd(3)-Pd(1)#1 | 47.52(5) |
| S(6)#1-Pd(1)-Pd(2) | 124.11(5) | S(3)-Pd(3)-Pd(1)#1 | 125.32(5) |
| S(2)-Pd(1)-Pd(2) | 48.84(5) | S(6)-Pd(3)-Pd(2) | 125.62(5) |
| S(5)#1-Pd(1)-Pd(2) | 129.71(5) | S(4)-Pd(3)-Pd(2) | 47.04(4) |
| S(1)-Pd(1)-Pd(3)#1 | 133.46(5) | S(5)-Pd(3)-Pd(2) | 131.30(5) |
| S(6)#1-Pd(1)-Pd(3)#1 | 47.29(4) | S(3)-Pd(3)-Pd(2) | 46.77(5) |
| S(2)-Pd(1)-Pd(3)#1 | 126.78(5) | Pd(1)#1-Pd(3)-Pd(2) | 120.57(2) |
| S(5)#1-Pd(1)-Pd(3)#1 | 47.62(5) | C(01)-S(1)-Pd(1) | 113.4(2) |
| Pd(2)-Pd(1)-Pd(3)#1 | 117.73(2) | C(01)-S(1)-Pd(2) | 113.0(2) |
| S(3)-Pd(2)-S(2) | 172.73(7) | Pd(1)-S(1)-Pd(2) | 82.20(6) |
| S(3)-Pd(2)-S(1) | 98.69(6) | C(13)-S(2)-Pd(2) | 106.6(3) |
| S(2)-Pd(2)-S(1) | 81.04(6) | C(13)-S(2)-Pd(1) | 108.7(3) |
| S(3)-Pd(2)-S(4) | 83.13(6) | Pd(2)-S(2)-Pd(1) | 82.13(6) |
| S(2)-Pd(2)-S(4) | 97.33(7) | C(25)-S(3)-Pd(2) | 103.9(3) |
| S(1)-Pd(2)-S(4) | 177.73(7) | C(25)-S(3)-Pd(3) | 111.0(2) |
| S(3)-Pd(2)-Pd(1) | 125.79(5) | Pd(2)-S(3)-Pd(3) | 86.01(6) |
| S(2)-Pd(2)-Pd(1) | 49.03(5) | C(37)-S(4)-Pd(3) | 108.5(2) |
| S(1)-Pd(2)-Pd(1) | 48.83(5) | C(37)-S(4)-Pd(2) | 107.7(2) |
| S(4)-Pd(2)-Pd(1) | 130.98(5) | Pd(3)-S(4)-Pd(2) | 86.08(7) |
| S(3)-Pd(2)-Pd(3) | 47.21(4) | C(49)-S(5)-Pd(1)#1 | 107.4(2) |
| S(2)-Pd(2)-Pd(3) | 128.84(5) | C(49)-S(5)-Pd(3) | 107.6(2) |
| S(1)-Pd(2)-Pd(3) | 135.39(5) | Pd(1)#1-S(5)-Pd(3) | 84.85(6) |
| S(4)-Pd(2)-Pd(3) | 46.88(5) | C(61)-S(6)-Pd(3) | 109.9(2) |
| Pd(1)-Pd(2)-Pd(3) | 121.69(2) | C(61)-S(6)-Pd(1)#1 | 106.9(3) |
| S(6)-Pd(3)-S(4) | 96.47(7) | Pd(3)-S(6)-Pd(1)#1 | 85.35(6) |
| S(6)-Pd(3)-S(5) | 82.93(6) |  |  |

Symmetry transformations used to generate equivalent atoms: #1 -x+1,-y+1,-z+1
